# Supplementary material
Source: publisher figshare collection journal article supplement (https://diabetesjournals.figshare.com/ndownloader/files/23399417)
Supplement: Supplementary file 1 [file 23399417]

**Supplemental Table S1.** Details of the Wide Net algorithm.

|                                                                                                                                                                                        |
|----------------------------------------------------------------------------------------------------------------------------------------------------------------------------------------|
| <b>Individuals are considered to have possible diabetes if they meet any of the following criteria</b>                                                                                 |
| <ul style="list-style-type: none"> <li>• Hemoglobin A1c <math>\geq 6.5\%</math> (<math>\geq 48</math> mmol/mol)</li> </ul>                                                             |
| <b>OR</b>                                                                                                                                                                              |
| <ul style="list-style-type: none"> <li>• Fasting plasma glucose <math>\geq 126</math>mg/dl (<math>\geq 7.0</math> mmol/L)</li> </ul>                                                   |
| <b>OR</b>                                                                                                                                                                              |
| <ul style="list-style-type: none"> <li>• Random plasma glucose <math>\geq 200</math> mg/dl (<math>\geq 11.1</math> mmol/L)</li> </ul>                                                  |
| <b>OR</b>                                                                                                                                                                              |
| <ul style="list-style-type: none"> <li>• At least one of the following diabetes-related ICD-10 encounter diagnoses codes: E08, E09, E10, E11, or E13.</li> </ul>                       |
| <b>OR</b>                                                                                                                                                                              |
| <ul style="list-style-type: none"> <li>• A prescription for or administration of one or more medications residing in one of the following antidiabetic medication classes*:</li> </ul> |
| <ul style="list-style-type: none"> <li> <ul style="list-style-type: none"> <li>○ Alpha Glucosidase Inhibitors</li> </ul> </li> </ul>                                                   |
| <ul style="list-style-type: none"> <li> <ul style="list-style-type: none"> <li>○ Dipeptidyl Peptidase-4 (DPP4) Inhibitors</li> </ul> </li> </ul>                                       |
| <ul style="list-style-type: none"> <li> <ul style="list-style-type: none"> <li>○ Glucagon-like Protein-1 (GLP-1) Receptor Agonists</li> </ul> </li> </ul>                              |
| <ul style="list-style-type: none"> <li> <ul style="list-style-type: none"> <li>○ Insulin</li> </ul> </li> </ul>                                                                        |
| <ul style="list-style-type: none"> <li> <ul style="list-style-type: none"> <li>○ Meglitinides</li> </ul> </li> </ul>                                                                   |
| <ul style="list-style-type: none"> <li> <ul style="list-style-type: none"> <li>○ Sodium-glucose co-transporter-2 (SGLT2) inhibitors</li> </ul> </li> </ul>                             |
| <ul style="list-style-type: none"> <li> <ul style="list-style-type: none"> <li>○ Sulfonylureas</li> </ul> </li> </ul>                                                                  |
| <ul style="list-style-type: none"> <li> <ul style="list-style-type: none"> <li>○ Thiazolidinediones</li> </ul> </li> </ul>                                                             |
| <ul style="list-style-type: none"> <li> <ul style="list-style-type: none"> <li>○ Other</li> </ul> </li> </ul>                                                                          |

\* Lists of RxNorm concept unique identifiers (CUIs) for specific medications occurring in each of these classes is included as a .csv file in the supplemental material

**Supplemental Table S2. Candidate variables defined**

| Description                                      | Definition                                                                                                                                                                                                                 | Included in Final Regression Model |
|--------------------------------------------------|----------------------------------------------------------------------------------------------------------------------------------------------------------------------------------------------------------------------------|------------------------------------|
| Maximum HbA1c                                    | highest A1c value observed before 1/1/2018. Variable was categorized into one of the following levels: <5.7% (39mmol/mol, 5.7-6.4% (39mmol/mol-48mmol/mol, >=6.5% (48mmol/mol), not measured                               | X                                  |
| Antihyperlipidemics†                             | Patient was ever prescribed an antihyperlipidemic medication prior to 1/1/2018. (Yes or No)                                                                                                                                |                                    |
| Outpatient antihypertensive†                     | Patient was ever prescribed an antihypertensive medication prior to 1/1/2018. (Yes or No)                                                                                                                                  |                                    |
| Any antidiabetic medicine†                       | Patient was ever prescribed an antidiabetic medication prior to 1/1/2018. (Yes or No)                                                                                                                                      | X                                  |
| Any diabetic ketoacidosis*                       | Any ICD-10 encounter diagnosis for DKA prior to 1/1/2018                                                                                                                                                                   | X                                  |
| Ethnicity                                        | Hispanic or non-Hispanic                                                                                                                                                                                                   | X                                  |
| Any elevated outpatient glucose                  | Any elevated values of outpatient glucose (random >=200 mg/dl, fasting >=126 mg/dl) via venipuncture or fingerstick prior to 1/1/2018. (Yes or No)                                                                         | X                                  |
| Multiple elevations in outpatient random glucose | Elevated values of outpatient random glucose (>=200 mg/dl) via venipuncture or fingerstick prior to 1/1/2018 on at least 2 separate occasions.                                                                             | X                                  |
| Median high-density lipoprotein                  | Median of all serum HDL values (mg/dl) obtained prior to 1/1/2018, categorized as: 1 <sup>st</sup> quartile, 2 <sup>nd</sup> quartile, 3 <sup>rd</sup> quartile, 4 <sup>th</sup> quartile, or missing.                     |                                    |
| Median low-density lipoprotein                   | Median of all serum LDL values (mg/dl) obtained prior to 1/1/2018, categorized as: 1 <sup>st</sup> quartile, 2 <sup>nd</sup> quartile, 3 <sup>rd</sup> quartile, 4 <sup>th</sup> quartile, or missing.                     |                                    |
| Any contraceptive medication†                    | Patient was ever prescribed a contraceptive medication prior to 12/31/2018. (Yes or No)                                                                                                                                    | X                                  |
| Any diabetes*                                    | Any ICD-10 encounter diagnosis for diabetes (all types) prior to 1/1/2018. (Yes or No)                                                                                                                                     |                                    |
| Hyperlipidemia*                                  | Any ICD-10 encounter diagnosis for hyperlipidemia prior to 1/1/2018. (Yes or No)                                                                                                                                           |                                    |
| Hypertension*                                    | Any ICD-10 encounter diagnosis for hypertension prior to 1/1/2018. (Yes or No)                                                                                                                                             |                                    |
| Menstrual irregularities*                        | Any ICD-10 encounter diagnosis for menstrual irregularities prior to 1/1/2018. (Yes or No)                                                                                                                                 |                                    |
| Obesity*                                         | Any ICD-10 encounter diagnosis for obesity prior to 1/1/2018. (Yes or No)                                                                                                                                                  | X                                  |
| Other diabetes type*                             | Any ICD-10 diabetes specific encounter diagnoses codes for diabetes types “other” than type 1 or type 2 prior to 1/1/2018. (Yes or No)                                                                                     |                                    |
| PCOS*                                            | Any ICD-10 encounter diagnosis for PCOS prior to 1/1/2018. (Yes or No)                                                                                                                                                     | X                                  |
| Race                                             | White, black, or other                                                                                                                                                                                                     |                                    |
| Gender                                           | Male or female                                                                                                                                                                                                             |                                    |
| Median triglyceride                              | Median of all outpatient serum triglyceride values (mg/dl) obtained prior to 1/1/2018, categorized as: 1 <sup>st</sup> quartile, 2 <sup>nd</sup> quartile, 3 <sup>rd</sup> quartile, 4 <sup>th</sup> quartile, or missing. |                                    |
| Any metformin†                                   | Patient was ever prescribed metformin prior to 12/31/2018. (Yes or No)                                                                                                                                                     | X                                  |
| Proportion of “other” diabetes codes             | Count of “other” diabetes type ICD-10 codes / total count of all diabetes codes prior to 1/1/2018. Variable was categorized into one of the following levels: 0-0.24, 0.25-0.49, 0.5-0.74, 0.75-1                          | X                                  |
| Proportion of type 1 diabetes codes              | Count of type 1 specific diabetes ICD-10 codes / total count of all diabetes codes prior to 1/1/2018. Variable was categorized into one of the following levels: 0-0.24, 0.25-0.49, 0.5-0.74, 0.75-1                       | X                                  |
| Proportion of type 2 diabetes codes              | Count of type 2 specific diabetes ICD-10 codes / total count of all diabetes codes prior to 1/1/2018. Variable was categorized into one of the following levels: 0-0.24, 0.25-0.49, 0.5-0.74, 0.75-1                       | X                                  |

|                                         |                                                                                                                                                                    |   |
|-----------------------------------------|--------------------------------------------------------------------------------------------------------------------------------------------------------------------|---|
| Most common diabetes type specific code | Which diabetes type specific ICD 10 encounter diagnoses occurred the most frequently. Categorized as: <2 codes, type1, type 2, other                               | X |
| Age                                     | Age in years as of 12/31/2017. Modelled as a continuous variable using restricted cubic splines with 3 knots.                                                      | X |
| Count of “other” diabetes codes         | number of times that an “other” diabetes type ICD 10 code occurred before 1/1/2018. Modelled as a continuous variable using restricted cubic splines with 3 knots. |   |
| Count of type 1 diabetes codes          | number of times that type 1 diabetes ICD 10 code occurred before 1/1/2018. Modelled as a continuous variable using restricted cubic splines with 3 knots.          | X |
| Count of type 2 diabetes codes          | number of times that an “other” diabetes type ICD 10 code occurred before 1/1/2018. Modelled as a continuous variable using restricted cubic splines with 3 knots. |   |

\* Diagnoses were dichotomous variables based on the presence of one or more structured diagnoses code(s) (ICD10) prior to 1/1/2018. Specific ICD10 codes provided in supplemental table S4.

† list of specific generic medication names and associated RxNorm codes are provided in the supplemental medication comma separated value file (.csv).

PCOS = Polycystic Ovarian Syndrome

DKA = Diabetic Keto-Acidosis

HDL = High density lipoprotein

LDL = Low density lipoprotein

**Supplemental Table S3.** Performance of multinomial regression and a rule-based algorithm using ICD 10 codes for determining diabetes status and type by site using SEARCH cohort status as gold standard.

|                              |           | Multinomial Regression |             |           | Rule-Based Algorithm |            |          |
|------------------------------|-----------|------------------------|-------------|-----------|----------------------|------------|----------|
|                              | Site      | Ohio*                  | Washington† | Colorado† | Ohio                 | Washington | Colorado |
|                              | N         | 3742                   | 2260        | 2680      | 3742                 | 2260       | 2680     |
| Diabetes<br>n = 5,308        | <i>Se</i> | 0.985                  | 0.922       | 0.985     | 0.988                | 0.988      | 0.997    |
|                              | <i>Sp</i> | 0.978                  | 0.993       | 0.976     | 0.972                | 0.972      | 0.954    |
|                              | PPV       | 0.970                  | 0.997       | 0.992     | 0.932                | 0.990      | 0.985    |
|                              | NPV       | 0.989                  | 0.813       | 0.954     | 0.992                | 0.966      | 0.990    |
| Type 1 Diabetes<br>n = 4,732 | <i>Se</i> | 0.891                  | 0.981       | 0.986     | 0.975                | 0.968      | 0.991    |
|                              | <i>Sp</i> | 0.989                  | 0.969       | 0.931     | 0.988                | 0.986      | 0.928    |
|                              | PPV       | 0.980                  | 0.985       | 0.968     | 0.980                | 0.993      | 0.967    |
|                              | NPV       | 0.939                  | 0.961       | 0.969     | 0.985                | 0.938      | 0.979    |
| Type 2 Diabetes<br>n = 400   | <i>Se</i> | 0.692                  | 0.172       | 0.856     | 0.899                | 0.910      | 0.887    |
|                              | <i>Sp</i> | 0.991                  | 0.998       | 0.988     | 0.965                | 0.975      | 0.985    |
|                              | PPV       | 0.791                  | 0.821       | 0.722     | 0.547                | 0.697      | 0.683    |
|                              | NPV       | 0.986                  | 0.950       | 0.995     | 0.995                | 0.994      | 0.996    |

|                                                                             |           |       |       |       |       |       |       |
|-----------------------------------------------------------------------------|-----------|-------|-------|-------|-------|-------|-------|
| Other Diabetes Type<br>n = 176<br>(e.g., medication-<br>induced, monogenic) | <i>Se</i> | 0.679 | 0.240 | 0.224 | 0.642 | 0.480 | 0.367 |
|                                                                             | <i>Sp</i> | 0.949 | 0.999 | 0.997 | 0.996 | 0.997 | 0.995 |
|                                                                             | PPV       | 0.161 | 0.667 | 0.710 | 0.694 | 0.667 | 0.735 |
|                                                                             | NPV       | 0.995 | 0.992 | 0.971 | 0.995 | 0.994 | 0.976 |
| Kappa Statistic                                                             |           | 0.870 | 0.846 | 0.894 | 0.909 | 0.919 | 0.903 |
| Accuracy                                                                    |           | 0.928 | 0.928 | 0.951 | 0.950 | 0.961 | 0.955 |

*Se* = Sensitivity

*Sp* = Specificity

PPV = Positive Predictive Value

NPV = Negative Predictive Value

LR+ = Positive Likelihood Ratio

LR- = Negative Likelihood Ratio

Accuracy = number correctly classified / N

Positive and Negative Likelihood Ratios may be calculated with the following formulas:

$LR+ = Se/(1 - Sp)$ ,  $LR- = (1 - Se)/Sp$

\* Cincinnati Children's Hospital

† Colorado Children's Hospital

‡ Seattle Children's Hospital

#### Supplemental Table S4. ICD-10 codes used for each condition

| Diagnosis                | ICD-10 codes                     |
|--------------------------|----------------------------------|
| Hypertension             | I10-I15.x                        |
| Hyperlipidemia           | E78.0-E78.5.x                    |
| Obesity                  | E66.x                            |
| PCOS                     | E28.2x                           |
| Menstrual Irregularities | N91-N92.x, N93.1, N93.8, N93.9   |
| Diabetes                 | E08-E13.x, P70.2, O24.0x, O24.1x |
